# Supplementary material for: Reconstitution of a Reversible Membrane Switch via Prenylation by One-Pot Cell-Free Expression
Source: PubMed Central journal article supplement (PMC9872162; doi:10.1021/acssynbio.2c00406), 2022-11-29
Supplement: sb2c00406_si_001.pdf [file sb2c00406_si_001.pdf]

## Supporting Information

### Reconstitution of a reversible Membrane Switch via Prenylation by One-pot Cell Free Expression

Lei Kai<sup>1,2,\*</sup>, Sonal<sup>1,3</sup>, Tamara Heermann<sup>1</sup>, Petra Schwille<sup>1\*</sup>

#### Affiliations:

1. Department of Cellular and Molecular Biophysics, Max Planck Institute of Biochemistry, D-82152 Martinsried, Germany
2. School of Life Sciences, Jiangsu Normal University, Shanghai Road 101, 221116 Xuzhou, P.R. China
3. Biosciences Division, University College London, Gower Street, London WC1E 6BT, UK

\* corresponding authors:

Prof. Petra Schwille

ORCID: 0000-0002-6106-4847

[schwille@biochem.mpg.de](mailto:schwille@biochem.mpg.de)

Phone: +49 89 8578-2900

Fax: +49 89 8578-2903

Prof. Lei Kai

ORCID: 0000-0003-0879-7918

[lkai@jsnu.edu.cn](mailto:lkai@jsnu.edu.cn)

Phone: +86 15852001351

## Supplementary Figures

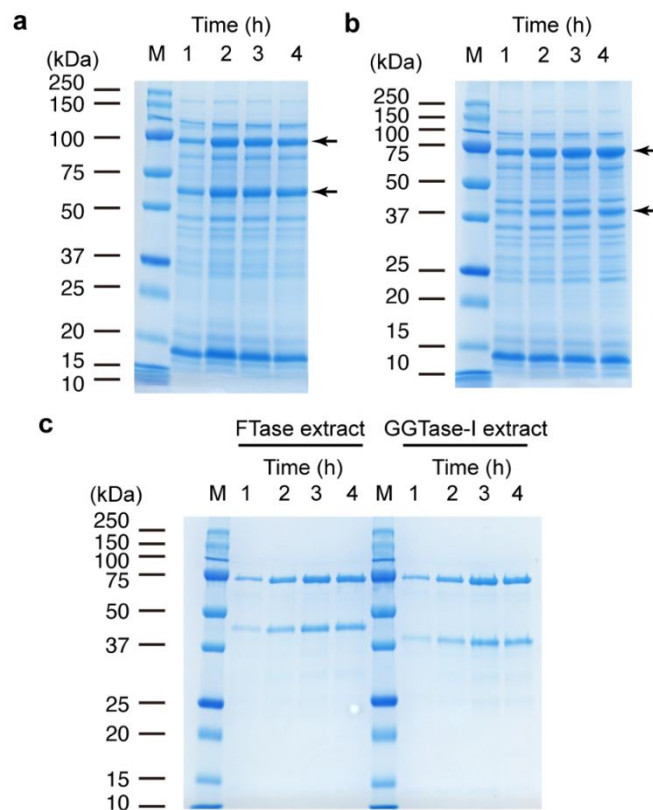

**Figure S1. Screening of induction time for the preparation of prenyltransferase-enriched extracts.** Coomassie-stained SDS-PAGE gels of clarified FTase **a**) and GGTase-I **b**) enriched cell lysates for varying time-points (1, 2, 3 or 4 h) after induction of expression. **c**) Coomassie-stained gel of the IMAC-purified prenyltransferase-enriched lysates after induction of expression. Numbers above each lane represent the induction time in hours. Black arrows highlight the band corresponding to the  $\alpha$  and  $\beta$  subunits of the prenyltransferase.

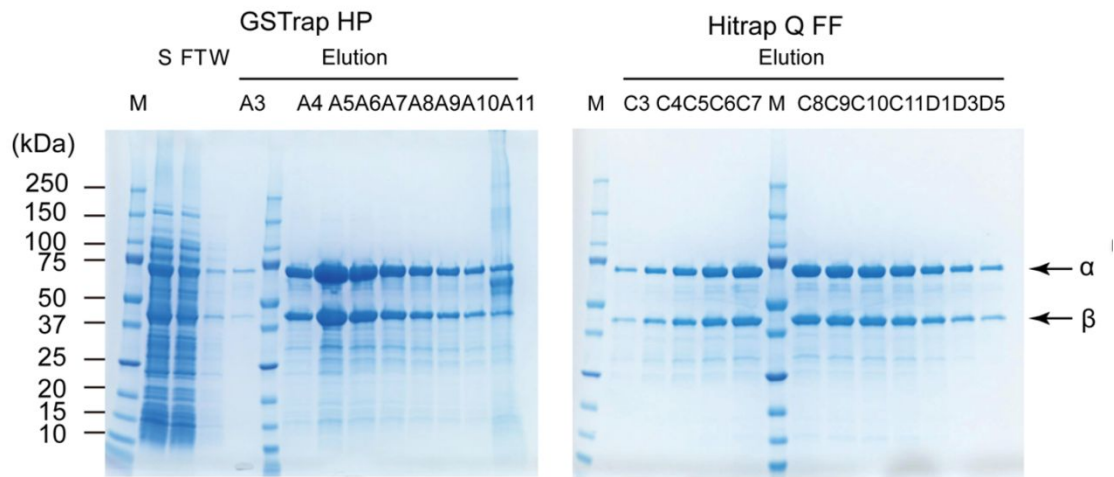

**Figure S2. Purification of the prenyltransferase FTase.** Coomassie-stained gels of collected fractions from the purification via a GSTrap HP column (left panel), followed by a Hitrap Q FF column (right panel). Lanes are titled with the fraction number obtained during elution. S indicates the supernatant, FT the flow-through, W the washing step and M denotes the protein marker. Black arrows indicate the bands that correspond to the  $\alpha$  and  $\beta$  subunit of the FTase.

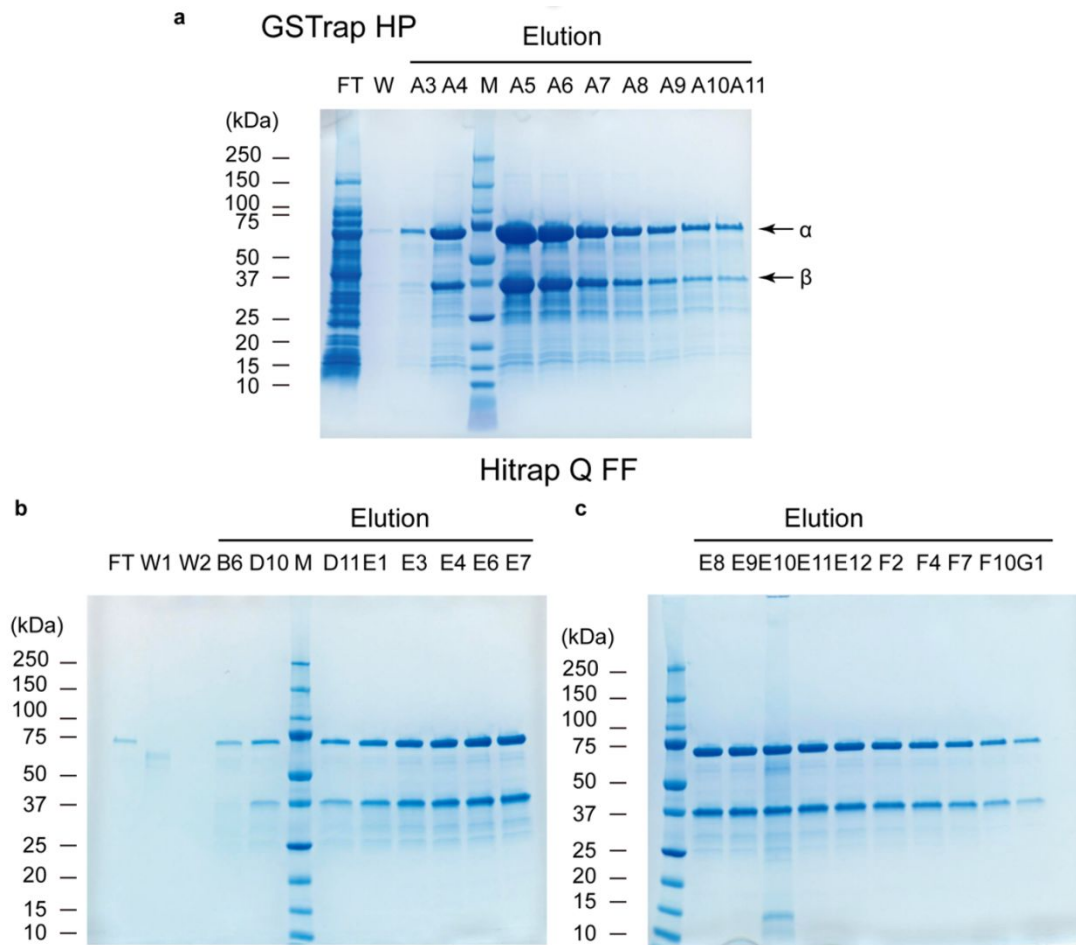

**Figure S3. Purification of the prenyltransferase GGTase-I.** Coomassie-stained gels of fractions collected from the purification via a GSTrap HP column **a)**, followed by a Hitrap Q FF column **b-c)**. Lanes are titled with the fraction number obtained during elution. FT indicates the flow-through and W, W1 and W2 the washing steps. M denotes the protein marker in all gels. Black arrows indicate the bands corresponding to the  $\alpha$  and  $\beta$  subunit of the GGTase-I.

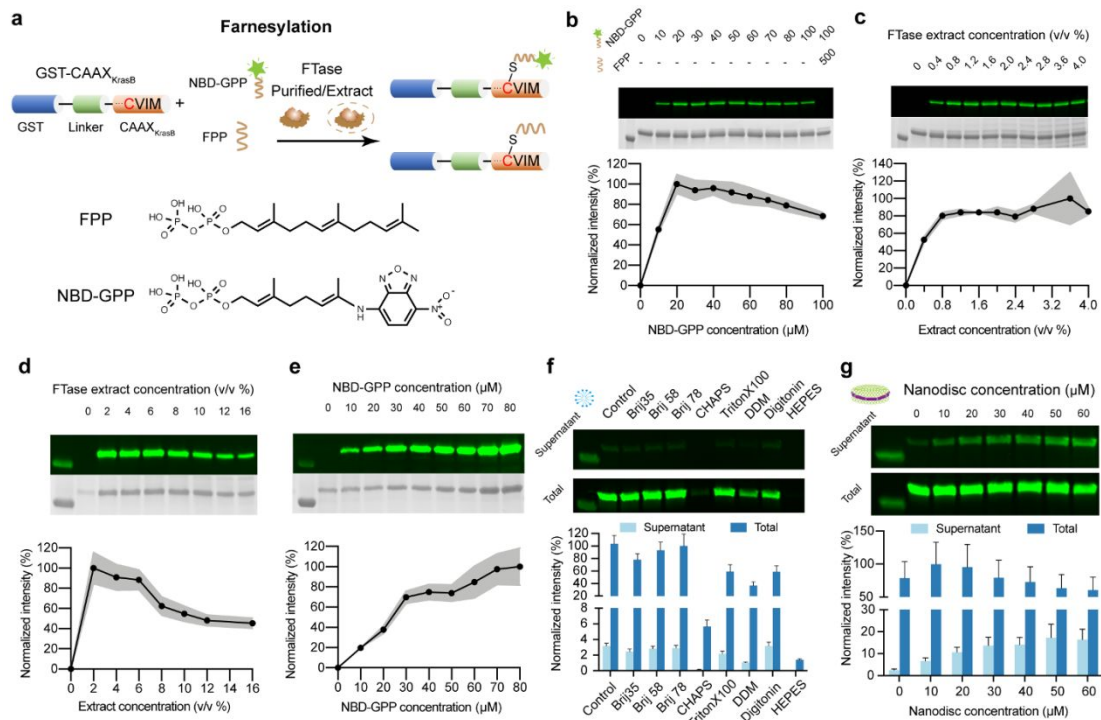

**Figure S4 Establishment of cell-free prenylation protein synthesis (CFpPS) system for farnesylation.** **a)** Schematic illustration of the chimeric proteins GST-CAAX<sub>KrasB</sub> that are farnesylated via purified FTase or FTase-enriched extracts. **b)** Titration of the NBD-GPP with purified FTase using in-gel fluorescence. Last lane showed the competition assay performed by adding the unlabeled analogue—FPP—at a 5-fold concentration of the highest tested for NBD-modified analogue. Concentration (μM) of lipid donor in each reaction is stated above the corresponding gel lane. **c)** Titration of FTase-enriched extracts using In-gel fluorescence with 10 μM GST-CAAX<sub>KrasB</sub> and 20 μM NBD-GPP. Extract concentration is shown as percentage volume of FTase-enriched extract included in the standard *E. coli* CFPS. **d)** Concentration optimization of FTase-enriched extract in CFpPS system using in-gel fluorescence. Note that GST-CAAX<sub>KrasB</sub> is co-translationally prenylated in the CFpPS system. Extract concentration is shown as percentage volume of the enriched extract included in the standard *E. coli* CFPS. **e)** In-gel fluorescence analysis for optimizing the concentration of NBD-GPP in the CFpPS system. **f)** Screening of detergents for soluble expression of farnesylated GST-CAAX<sub>KrasB</sub>. Respective control reactions were performed without any detergent. All intensity values were normalized using the highest averaged values. **g)** Nanodisc titration for the soluble expression of GST-CAAX<sub>KrasB</sub> in CFpPS system. Fluorescence intensities of the protein band for each fraction were measured through in-gel fluorescence and normalized to the highest averaged value. Each image panel (b-e) includes a representative gel imaged in fluorescence mode to visualize NBD (upper) and colorimetric mode to visualize Coomassie staining (lower). In all graphs (b-e), mean values from three independent replicates are shown as black dots, while the grey shading represents standard deviation, n=3.

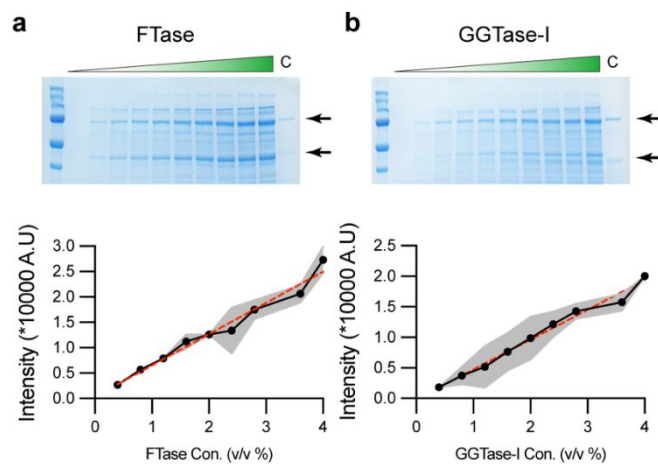

**Figure S5. Crude estimation of the prenyltransferase concentration in enriched extracts.** Coomassie-stained SDS-PAGE gels (upper row) of the serial dilution of either Ftase- **a**) or GGTase-I-enriched **b**) extract. A control sample (lane C) corresponding to the respective purified prenyltransferase and with a known concentration is shown for comparison (0.4  $\mu$ M FTase, 2  $\mu$ M GGTase-I). Lower panel: Estimation of the prenylatransferase concentration in the enriched extracts through colorimetry density estimation. Black arrows indicate the bands corresponding to the  $\alpha$  and  $\beta$  subunit of the prenyltransferases.

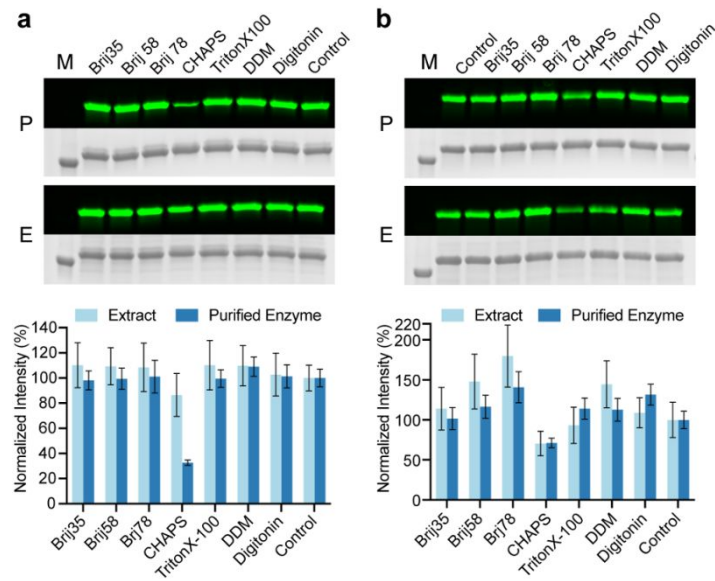

**Figure S6. Detergent compatibility for *in vitro* prenylation reactions.** Detergent compatibility for farnesylation **a)** and for geranylgeranylation **b)**. P denotes purified prenyltransferase, E denotes prenyltransferase-enriched extract and M denotes protein marker. In-gel fluorescence of NBD-labeled isoprenoid group was visualized for each modified protein band. The intensity of each fluorescent band was calibrated by densitometry from the corresponding Coomassie-stained gel images and normalized according to the Control without any detergent. Bar graphs display mean values and standard deviations are shown, n = 3 independent replicates.

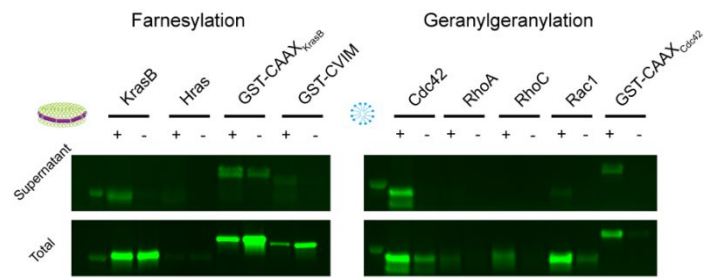

**Figure S7. In-gel fluorescence analysis of the expression and solubilization of representative proteins.** NBD-labeled isoprenoid group was used as lipid donor and visualized by in-gel fluorescence. Proteins correspond to those listed in Table S1. Either nanodiscs (left panel) or the detergent Brij58 (right panel) was used for farnesylation and geranylgeranylation of the representative CAAX proteins, respectively.



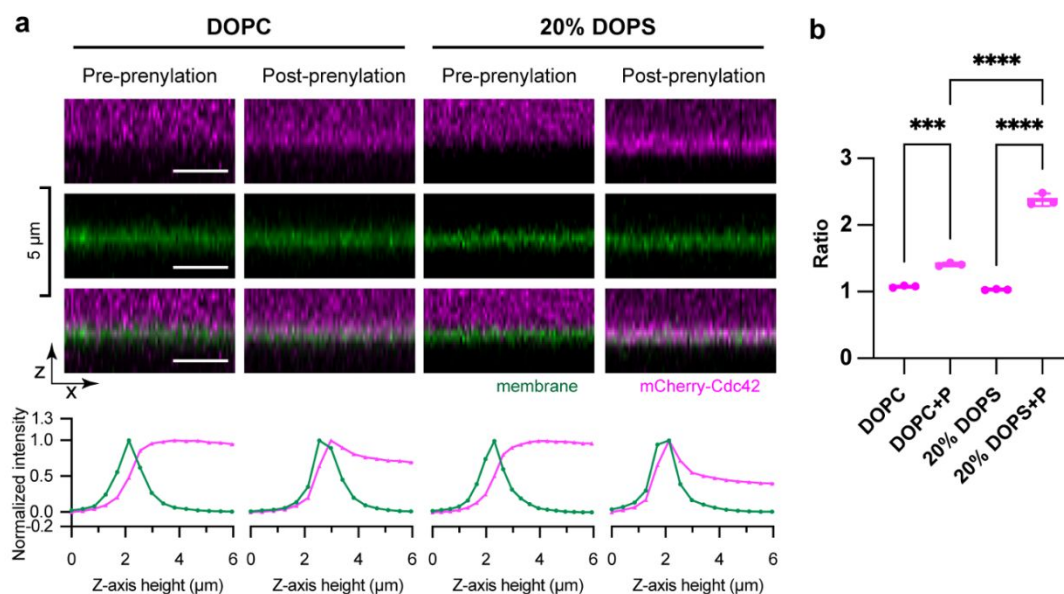

**Figure S8. Charge-dependent targeting of mCherry-Cdc42 to supported lipid bilayers before and after prenylation.** **a)** Orthogonal views (upper panel) of mCherry-Cdc42 binding to neutral (100 % DOPC) or negatively charged (20% DOPS, 80% DOPC) supported lipid bilayers (SLB) before and after the addition of the lipid donor GGPP, membrane channel was visualized by the addition of 0.05 mol% ATTO488-DOPE. Lower panel: Normalized intensities of the respective Z-stacks for each experimental condition. **b)** Ratio of the mCherry-Cdc42 intensity averaged over the Z-slice corresponding to the membrane and averaged over the slice of the stack furthest from the membrane (in solution). Abbreviations DOPC and 20 % DOPS stand for supported lipid bilayers containing only neutral lipids or 20 % of negatively charged ones, respectively. “+P” indicates the presence of the lipid donor GGPP and hence a prenylated protein state. Statistical analysis of the determined ratios was performed by a one-way ANOVA followed by multiple comparisons. P values of 0.0001 are highlighted by \*\*\* while \*\*\*\* indicate P values of <0.0001, n = 3 independent replicates.

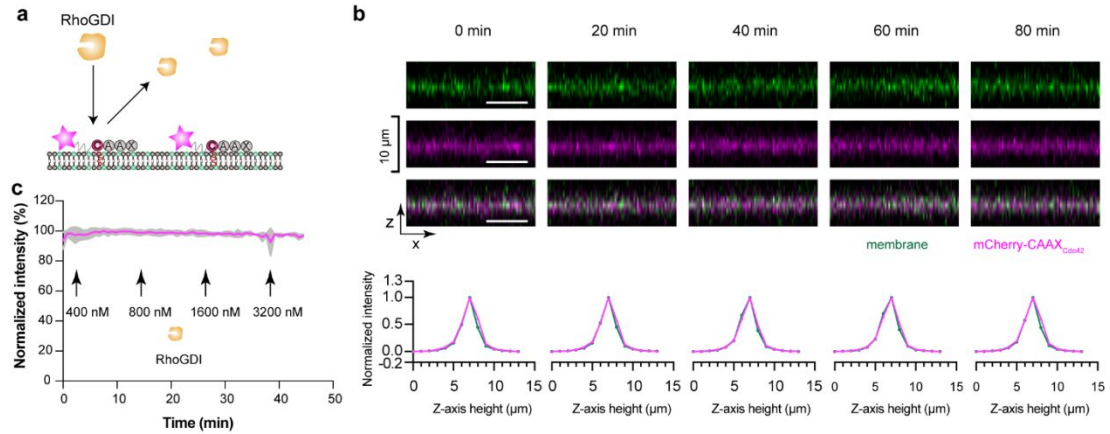

**Figure S9. RhoGDI fails to extract mCherry-CAAX<sub>Cdc42</sub> from the membrane.** **a)** Schematic illustration showing that unlike full-length Cdc42 (Fig. 4), RhoGDI cannot bind to mCherry-CAAX<sub>Cdc42</sub> and extract it from the membrane. mCherry-CAAX<sub>Cdc42</sub> lacks the interface required for RhoGDI interaction of Cdc42. **b)** Orthogonal view of representative fluorescent images (upper panel) of membrane-localized mCherry-CAAX<sub>Cdc42</sub> in the presence of RhoGDI. Lower panel, normalized fluorescence intensities of the corresponding images from upper panel. Images correspond to time since the start of imaging of an SLB (80% DOPC, 19.95% DOPS, 0.05% Atto-488 PE) loaded with prenylated mCherry-CAAX<sub>Cdc42</sub>. RhoGDI was added in increments at times observed in panel **c**. The image panels show the membrane in green (upper row), mCherry-tagged protein in magenta (middle row) and a merge of both channels (lower row). Scale bar: 10  $\mu\text{m}$ . **c)** Normalized average intensity of the mCherry-CAAX<sub>Cdc42</sub> signal in the presence of RhoGDI. Standard deviations are indicated in gray shades ( $n=3$ ) and a representative dataset of 3 independent replicates is shown. Intensity values were obtained by averaging over the slice that corresponds to the membrane and then normalized by setting the maximum and minimum intensities recorded during each experiment as 0 and 1, respectively. The indicated RhoGDI concentrations represent freshly added protein into the chamber at each time point besides the pre-existing RhoGDI.

## Supplementary Tables

**Table S1 List of the protein constructs used in this study**

| Protein name                  | Vector                        | Source                       |
|-------------------------------|-------------------------------|------------------------------|
| FTase $\alpha$                | pGEXTEV-FTase- $\alpha$       | Dursina, et al. <sup>1</sup> |
| FTase $\beta$                 | pET28-FTase- $\beta$          | Dursina, et al. <sup>1</sup> |
| GGTase-I $\alpha$             | pGEXTEV-GGTase-I- $\alpha$    | Dursina, et al. <sup>1</sup> |
| GGTase-I $\beta$              | pET28-GGTase-I- $\beta$       | Dursina, et al. <sup>1</sup> |
| GST-CAAX <sub>KrasB</sub>     | pGEX-RG-KrasB-C1-15           | This study                   |
| GST-CAAX <sub>Cdc42</sub>     | pGEX-RG-hCdc42-C1-9           | This study                   |
| RhoGDI                        | pCoofy1_Linker-hRhoGDI        | This study                   |
| mCherry-CAAX <sub>Cdc42</sub> | pCoofy1a-mCherry-RG-Caax-CVLL | This study                   |
| RhoA                          | pIVEX2.3d-RhoA                | This study                   |
| RhoC                          | pIVEX2.3d-RhoC                | This study                   |
| Rac1                          | pIVEX2.3d-Rac1                | This study                   |
| KrasB                         | pIVEX2.3d-KrasB               | This study                   |
| HRas                          | pIVEX2.3d-HRas                | This study                   |
| Cdc42                         | pIVEX2.3d-Cdc42               | This study                   |
| mCherry-Cdc42                 | pCoofy1a-mCherry-Cdc42        | This study                   |
| MSP1E3D1                      | pET28a-MSP1E3D1               | Li, et al. <sup>2</sup>      |

**Table S2. Summary of the CFpPS system's performance in expressing and solubilizing chimeric CAAX-proteins and native small GTPases.**

| Constructs                | C-terminal sequences | Type of Prenylation | Detected Modification | Soluble Modification |
|---------------------------|----------------------|---------------------|-----------------------|----------------------|
| GST-CAAX <sub>KrasB</sub> | GKKKKKKSKTKCVIM      | F/G                 | +                     | +                    |
| GST-CVIM                  | GCVIM                | F/G                 | +                     | +                    |
| GST-CAAX <sub>Cdc42</sub> | KKSRRCVLL            | G                   | +                     | +                    |
| KrasB                     | GKKKKKKSKTKCVIM      | F/G                 | +                     | +                    |
| Hras                      | CVLS                 | F                   | +                     | +                    |
| Cdc42                     | KKSRRCVLL            | G                   | +                     | +                    |
| RhoA                      | RRGKKKSGCLVL         | G                   | +                     | -                    |
| RhoC                      | KNKRRRGCPIL          | G                   | +                     | -                    |
| Rac1                      | KKRKRKCLLL           | G                   | +                     | +                    |

F, farnesylation; G, geranylgeranylation.

## Gene and protein sequences

Record of the complete sequences of genes and proteins that have been used or created in this study. For fusion constructs, linker sequences are shown in italics. The 3C protease recognition sequences are highlighted with underline. C-terminal sequences of KrasB and Cdc42 are shown in bold in chimeric constructs.

### FTase $\alpha$

Protein sequence

MSPILGYWKIKGLVQPTRLLEYLEEKYEEHLYERDEGDKWRNKKFELGLEFPNLPYYID  
GDVKLTQSMAIRYIADKHNMLGGCPKERAEISMLEGAVLDIRYGVSR IAYSKDFETLKV  
DFLNKLPEMLKMFEDRLCHKTYLNGDHVTHPDFMLYDALDVVLYMDPMCLDAFPKLV  
CFKKRIE AIPQIDKYLKSSKYIAWPLQGWQATFGGGDHPPTNRWVSMADENLYFQGHMA  
ATEGVGESAPGGEPGQPEQPPPPPPPPAQQPQEEEMAAEAGEAAASPMDDGFLSLDSPT  
YVLYRDR AEWADIDPVPQNDGSPVQIIYSEKFRDVYDYFRAVLQORDERSERAFKLTRD  
AIELNAANYTVWHFRRVLLRSLQKDLQEEMNYITAIIEEQPKNYQVWHHRRVLVEWLKD  
PSQELEFIADILNQDAKNYHAWQHRQWVIQEFRLWDNELQYVDQLLKEDVRNNSVWNQ  
RHFVISNTTGYSRAVLREEVQYTLEMIKLVPHNESAWNYLKGILQDRGLSRYPNLLNQL  
LDLQPSHSSPYLIAFLVDIYEDMLENQCDNKEDILNKALELCEILAKEKDTIRKEYWRYIG  
RSLQSKHSRES DIPASV\*

DNA sequence

ATGTCCCCTATACTAGGTTATTGGAAAATTAAGGGCCTTGTGCAACCCACTCGACTTC  
TTTTGGAATATCTTGAAGAAAAATATGAAGAGCATTGTATGAGCGCGATGAAGGTG  
ATAAATGGCGAAACAAAAGTTTGAATTGGGTTTGGAGTTTCCCAATCTTCCTTATTA  
TATTGATGGTGATGTTAAATTAACACAGTCTATGGCCATCATACTGTTATATAGCTGAC  
AAGCACAACATGTTGGGTGGTTGTCCAAAAGAGCGTGCAGAGATTTCAATGCTTGAA  
GGAGCGGTTTTGGATATTAGATACGGTGTTCGAGAATTGCATATAGTAAAGACTTTG  
AAACTCTCAAAGTTGATTTTCTTAACAAGCTACCTGAAATGCTGAAAATGTTTCGAAGA  
TCGTTTATGTCATAAAACATATTTAAATGGTGATCATGTAACCCATCCTGACTTCATG  
TTGTATGACGCTCTTGATGTTGTTTTATACATGGATCCAATGTGCCTGGATGCGTTCCC  
AAAATTAGTTTGTTTTAAAAAACGTATTGAAGCTATCCCACAAATTGATAAGTACTTG  
AAATCCAGCAAGTATATAGCATGGCCTTTCAGGGCTGGCAAGCCACGTTTGGTGGT  
GGCGACCATCCTCCAACATAATCGATGGGTATCCATGGCTGATGAGAATCTTTATTTTC  
AGGGCCATATGGCGGCCACTGAGGGGGTTCGGGGAATCTGCGCCAGGCGGTGAGCCG  
GGACAGCCAGAGCAGCCGCCGCCCGCTCCTCCGCCGCCAGCACAGCAGCCGCAG  
GAAGAAGAGATGGCGGCCGAGGCCGGGAAGCAGCGGCGTCCCCTATGGACGACGG  
GTTTCTGAGCCTGGACTCGCCACCTATGTCTTGTACAGGGACAGGGCAGAGTGGGCT  
GACATAGACCCAGTGCCCAAGATGATGGCCCCAGTCCAGTGGTCCAGATCATCTAC  
AGTGAAAAGTTTAGAGACGTCTATGATTACTTCCGAGCTGTTCTGCAGCGCGATGAA  
AGAAGCGAACGAGCCTTTAAGCTCACTCGAGATGCTATTGAGTTAAACGCAGCCAAC  
TATACGGTGTGGCATTTCGGAGAGTTCTCTTGAGGTGCTTCAGAAGGATCTGCAAG  
AAGAAATGAACTACATCACTGCAATAATTGAGGAACAGCCAAAAACTATCAAGTTT  
GGCACCATAGGAGAGTATTAGTGGAGTGGCTGAAAGATCCTTCTCAAGAGCTCGAGT  
TCATCGCCGATATCCTTAATCAGGATGCAAAGAATTACCATGCCTGGCAGCATCGAC  
AGTGGGTCATTCAGGAGTTTCGACTTTGGGATAATGAGCTGCAGTATGTGGACCAGCT

TCTCAAAGAGGATGTGAGAAATAACTCTGTGTGGAACCAAAGACACTTCGTCATTTCT  
AATACCACTGGCTACAGTGATCGCGCTGTGTTGGAGAGAGAAGTCCAATATACTCTG  
GAAATGATCAAATTAGTGCCACACAATGAGAGTGCGTGGAACACTTGAAGGGATT  
TTGCAGGACCGTGGTCTTTCCAGATACCCTAATCTATTAACCAGTTGCTTGATTTAC  
AACCAAGTCACAGCTCCCCCTACCTAATTGCCTTTCTTGTGGATATCTATGAAGACAT  
GCTGGAAAACCAGTGTGACAACAAGGAGGACATTCTTAATAAAGCACTAGAGTTATG  
TGAGATTCTAGCTAAAGAAAAGGACACTATAAGAAAGGAATATTGGAGATATATTGG  
ACGGTCCCTCCAGAGTAAACACAGCAGAGAAAGTGACATACCGGCGAGTGTATAG

### **FTase $\beta$**

Protein sequence

MASSSSFTYYCPPSSSPVWSEPLYSLRPEHARERLQDDSVETVTSIEQAKVEEKIQEVFSSY  
KFNHLVPRLVLQREKHFHYLKRGLRQLTDAYECLDASRPWLCYWILHSLELLDEPIQIV  
ATDVCQFLELCQSPDGGFGGGPGQYPHLAPTYAAVNALCIIGTEEAYNVINREKLLQYLY  
SLKQPDGSFLMHVGGGEVDVRSAYCAASVASLTNIITPDLFEGTAEWIARCQNWEGGIGGV  
PGMEAHGGYTFCGLAALVILKKERSLNLKSLQVWVTSRQMRFEQGGFQGRCNKLVGDCY  
SFWQAGLLPLLHRALHAQGDPAALSMHWMFHQQAQLEIYLMCCQCPAGGLLDKPGKSR  
DFYHTCYCLSLSIAQHFSGAMLHDVVMGVPENVLQPTHPVYNIGPDKVIQATTHFLQ  
KPVPGFECEDAVTSDPATD\*

DNA sequence

ATGGCTTCTTCGAGTTCCTTCACCTATTATTGTCCTCCATCTTCTTCCCCTGTTTGGTCA  
GAACCGCTGTATAGTCTGAGACCTGAGCACGCGCGGGAGCGGTTGCAAGACGACTCA  
GTGAAAACAGTACGTCCATAGAACAGGCCAAAGTAGAAGAAAAGATCCAGGAGGT  
CTTCAGTTCTTACAAGTTTAACCACCTCGTACCAAGGCTCGTTCTGCAGAGGGAGAAG  
CACTTCCATTATCTGAAAAGAGGCCTTCGACAACCTGACAGATGCCTATGAGTGTCTGG  
ATGCCAGCCGCCCTGGCTCTGCTACTGGATCCTGCACAGCTTGGAGCTCCTCGACGA  
ACCCATCCCCCAAATAGTGGCTACAGATGTGTGTGTCAGTTCTTGGAGCTGTGTGACAGT  
CCAGACGGTGGCTTTGGAGGGGGCCCTGGTCAGTACCCACACCTCGCTCCCACGTAT  
GCAGCTGTCAACGCGCTATGCATCATTGGCACGGAGGAAGCCTACAACGTCATTAAC  
AGAGAGAAGCTCCTTCAGTACTTGTACTCCCTAAAGCAACCGGATGGCTCTTTTCTCA  
TGCACGTCGGAGGAGAGGTGGATGTAAGAAGTGCCTACTGTGCTGCCTCAGTAGCCT  
CTCTACCAACATCATCACTCCTGACCTCTTCGAAGGCACTGCTGAATGGATAGCAAG  
GTGCCAGAACTGGGAAGGCGGCATTGGCGGGGTGCCAGGGATGGAAGCCCACGGTG  
GCTACACCTTCTGTGGCTTGGCTGCGCTGGTGATCCTCAAGAAGGAACGTTCTTTGAA  
CCTGAAGAGCTTGCTACAATGGGTGACAAGCCGGCAGATGCGGTTTCAAGGAGGATT  
TCAGGGCCGCTGCAACAAGCTGGTGGACGGCTGCTACTCCTTCTGGCAGGCAGGACT  
TCTGCCCTGTTGCACCGGGCACTCCACGCTCAAGGTGACCCTGCCCTCAGCATGAGC  
CACTGGATGTTCCATCAGCAGGCGCTGCAGGAGTACATCCTCATGTGCTGCCAGTGTG  
CGGCTGGGGTCTCCTGGACAAACCTGGCAAGTCACGTGACTTCTACCATACTTGCTA  
CTGCCTGAGCGGCCTGTCCATTGCCAGCATTGTTGGAAGTGGAGCCATGCTGCACGAT  
GTGGTTCATGGGTGTGCTGAAAATGTTCTGCAGCCCACTACCCTGTGTACAACATCG  
GACCTGATAAGGTGATCCAGGCCACCACACACTTTCTGCAGAAGCCGGTCCCAGGCT  
TTGAGGAATGCGAAGATGCGGTGACCTCAGATCCTGCCACTGACTAG

**GGTase-I beta**

Protein sequence

MAATEDDRLAGSGEGERLDFLRDRHVRFQRCQLQVLPERYSSLETSRLTIAFFALSGLDM  
LDSL DVVNKDDIIEWIYSLQVLP TEDRSNLDRCGFRGSSYL GIPFNPSKNPGTAHPYDSGHI  
AMTYTGLSCLILGDDLSRVDKEACL AGLRALQLEDGSFCAVPEGSEND MRFVYCASCIC  
YMLNNWSGMDMKKAISYIRRSMSYDNGLAQQGAGLESHGGSTFCGIASLCLMGKLEEVFS  
EKELNRIKRWCIMRQQNGYHGRPNKPVDT CYSFWVGATL KLLKIFQYTNFEKNRNYILST  
QDRLVGGFAKWPD SHPDALHAYFGICGLSLMEESGICKVHPALNVSTRT SERLRDLHQ S  
WKT KDSKQCS DN VHISS\*

DNA sequence

ATGGCGGCCACAGAGGATGACAGACTGGCGGGGAGCGGAGAAGGAGAACGGCTGGA  
TTTCCTGCGGGACCGACACGTGCGGTTCTTCCAGCGCTGCCTCCAGGTCTTGCCGGAG  
CGGTATTCTTCGCTGGAGACCAGCAGGCTGACAATTGCATTTTTTGC ACTCTCTGGGC  
TGGATATGTTGGACTCCTTGGATGTGGTGAACAAAGACGATATAATAGAGTGGATT  
ATTCCTTG CAGGTTCTTCCCACAGAAGACAGGTCAAATCTGGATCGCTGTGGTTTCCG  
AGGTTCTTCATATTTGGGTATTCCATTCAACCCATCAAAGAATCCAGGCACAGCTCAT  
CCTTATGACAGTGGACACATAGCGATGACTTACACTGGTCTTTCCTGTTTAATTATCT  
TGGAGATGATTTAAGCCGAGTAGATAAAGAAGCTTGCTTAGCAGGCTTGAGAGCACT  
TCAGCTGGAAGATGGGAGCTTCTGTGCTGTTCTGAAGGCAGTGAGAATGACATGAG  
GTTTGTGTACTGTGCTTCTGCATTTGCTATATGCTCAACA ACTGGTCAGGCATGGAT  
ATGAAGAAAGCCATCAGCTACATTAGAAGAAGTATGTCCTATGACAATGGCCTGGCA  
CAGGGGGCAGGACTTGAGTCTCATGGAGGATCCACCTTTTGTGGCATTGCGTCACTGT  
GCCTGATGGGTAAACTGGAAGAAGTTTTTTCAGAGAAAGAACTGAACCGGATAAAGA  
GGTGGTGCATAATGAGGCAGCAGAACGGGTACCACGGAAGACCTAACAAGCCTGTC  
GACACCTGTTACTCTTCTGGGTGGGAGCAACACTAAAGCTTTTGAAAATTTTCCAGT  
ACACTAACTTTGAGAAGAATAGGAATTACATCTTATCAACTCAGGATCGCCTTGTTGG  
GGGATTTGCTAAATGGCCAGACAGTCATCCAGATGCTTTGCATGCGTACTTCGGGATC  
TGTGGCCTGTC ACTAATGGAGGAGAGTGG AATTTGTAAAGTTCATCCTGCTCTGAATG  
TAAGCACACGA ACTTCTGAGCGCCTCCGAGATCTCCATCAAAGCTGGAAGACCAAGG  
ACTCTAAACAGTGCTCAGACAATGTCCATATTTCCAGTTGA

**GST-CAAX<sub>KrasB</sub>**

Protein sequence

MNTIH HHHHHNTSSNSMSPILGYWKIKGLVQPTRL LLEYLEEKYEEHLYERDEGDKWRN  
KKFELGLEFPNLPYYIDGDVKLTQSM AIIRYIADKHNMLGGCPKERA EISMLEGAVLDIRY  
GVSRIAYS KDFETLKVDFLNKLPEMLKMFEDRLCHKTYLNGDHVTHPDFM LYDALDVV  
LYMDPMCLDAFPKLVCFKKRIEAI PQIDKYLKSSKYIAWPLQGWQATFGGGDHPPGSAGL  
*AEAAAKEAAAKEAAAKEAAAKAAAGKKKKKSKTKCVIM\**

DNA sequence

ATGAACACCATTCATCACCATCACCATCACAACACTAGTAGCAATTCCATGTCCCCTA  
TACTAGGTTATTGGAAAATTAAGGGCCTTGTGCAACCCACTCGACTTCTTTTGG AATA  
TCTTGAAGAAAAATATGAAGAGCATTGTATGAGCGCGATGAAGGTGATAAATGGCG  
AAACAAAAAGTTTGAATTGGGTTTGGAGTTTCCCAATCTTCCTTATTATATTGATGGT  
GATGTTAAATTAACACAGTCTATGGCCATCATACTTATATAGCTGACAAGCACAAC  
ATGTTGGGTGGTTGTCCAAAAGAGCGTGCAGAGATTTCAATGCTTGAAGGAGCGGTT

TTGGATATTAGATACGGTGTTCGAGAATTGCATATAGTAAAGACTTTGAAACTCTCA  
AAGTTGATTTTCTTAACAAGCTACCTGAAATGCTGAAAATGTTCGAAGATCGTTTATG  
TCATAAAACATATTTAAATGGTGATCATGTAACCCATCCTGACTTCATGTTGTATGAC  
GCTCTTGATGTTGTTTTATACATGGATCCAATGTGCCTGGATGCGTTCCCAAATAG  
TTTGTTTTAAAAACGTATTGAAGCTATCCCACAAATTGATAAGTACTTGAAATCCAG  
CAAGTATATAGCATGGCCTTTGCAGGGCTGGCAAGCCACGTTTGGTGGTGGCGACCA  
TCCTCCAGGTTCTGCGGGTTTAGCAGAGGCGGCAGCTAAAGAAGCTGCTGCCAAAGA  
AGCTGCCGCGAAAGAAGCGGCTGCCAAGGCTGCGGCAGGCAAGAAAAAGAAAAAGA  
AAAGCAAGACAAAATGTGTAATCATGTGA

### **GST-CAAX<sub>Cdc42</sub>**

Protein sequence

MNTIHSHHHHTSSNSMSPILGYWKIKGLVQPTRLLEYLEEKYEEHLYERDEGDKWRN  
KKFELGLEFPNLPYYIDGDVCLTQSMHIRYIADKHNMLGGCPKERAIEISMLEGAVLDIRY  
GVSRIAYSKDFETLKVDFLNKLPEMLKMFEDRLCHKTYLNGDHVTHPDFMLYDALDVV  
LYMDPMCLDAFPKLVCFKKRIEAIQIDKYLKSSKYIAWPLQGWQATFGGGDHPPGSAGL  
*AEAAAKEAAAKEAAAKEAAAKAAAKKSRRCVLL\**

DNA sequence

ATGAACACCATTTCATCACCATCACCATCACAACACTAGTAGCAATTCCATGTCCCCTA  
TACTAGGTTATTGGAAAATTAAGGGCCTTGTGCAACCCACTCGACTTCTTTTGGAAATA  
TCTTGAAGAAAAATATGAAGAGCATTGTATGAGCGCGATGAAGGTGATAAATGGCG  
AAACAAAAAGTTTGAATTGGGTTTGGAGTTTCCCAATCTTCCTTATTATATTGATGGT  
GATGTTAAATTAACACAGTCTATGGCCATCATACTTATATAGCTGACAAGCACAAC  
ATGTTGGGTGGTTGTCCAAAAGAGCGTGCAGAGATTTCAATGCTTGAAGGAGCGGTT  
TTGGATATTAGATACGGTGTTCGAGAATTGCATATAGTAAAGACTTTGAAACTCTCA  
AAGTTGATTTTCTTAACAAGCTACCTGAAATGCTGAAAATGTTCGAAGATCGTTTATG  
TCATAAAACATATTTAAATGGTGATCATGTAACCCATCCTGACTTCATGTTGTATGAC  
GCTCTTGATGTTGTTTTATACATGGATCCAATGTGCCTGGATGCGTTCCCAAATAG  
TTTGTTTTAAAAACGTATTGAAGCTATCCCACAAATTGATAAGTACTTGAAATCCAG  
CAAGTATATAGCATGGCCTTTGCAGGGCTGGCAAGCCACGTTTGGTGGTGGCGACCA  
TCCTCCAGGTTCTGCGGGTTTAGCAGAGGCGGCAGCTAAAGAAGCTGCTGCCAAAGA  
AGCTGCCGCGAAAGAAGCGGCTGCCAAGGCTGCGGCAAGAAATCCAGGCGGTGCG  
TTCTGCTGTGA

### **GST-CVIM**

Protein sequence

MNTIHSHHHHTSSNSMSPILGYWKIKGLVQPTRLLEYLEEKYEEHLYERDEGDKWRN  
KKFELGLEFPNLPYYIDGDVCLTQSMHIRYIADKHNMLGGCPKERAIEISMLEGAVLDIRY  
GVSRIAYSKDFETLKVDFLNKLPEMLKMFEDRLCHKTYLNGDHVTHPDFMLYDALDVV  
LYMDPMCLDAFPKLVCFKKRIEAIQIDKYLKSSKYIAWPLQGWQATFGGGDHPPGSAGL  
*AEAAAKEAAAKEAAAKEAAAKAAACVIM\**

DNA sequence

ATGTCCCCTATACTAGGTTATTGGAAAATTAAGGGCCTTGTGCAACCCACTCGACTTC  
TTTTGGAATATCTTGAAGAAAAATATGAAGAGCATTGTATGAGCGCGATGAAGGTG

ATAAATGGCGAAACAAAAAGTTTGAATTGGGTTTGGAGTTTCCCAATCTTCCTTATTA  
TATTGATGGTGATGTTAAATTAACACAGTCTATGGCCATCATA CGTTATATAGCTGAC  
AAGCACAACATGTTGGGTGGTTGTCCAAAAGAGCGTGCAGAGATTTCAATGCTTGAA  
GGAGCGGTTTTGGATATTAGATACGGTGTTCGAGAATTGCATATAGTAAAGACTTTG  
AAACTCTCAAAGTTGATTTTCTTAACAAGCTACCTGAAATGCTGAAAATGTTCGAAGA  
TCGTTTATGTCATAAAACATATTTAAATGGTGATCATGTAACCCATCCTGACTTCATG  
TTGTATGACGCTCTTGATGTTGTTTTATACATGGATCCAATGTGCCTGGATGCGTTCCC  
AAAATTAGTTTGTTTTAAAAAACGTATTGAAGCTATCCACAAATTGATAAGTACTTG  
AAATCCAGCAAGTATATAGCATGGCCTTTCAGGGCTGGCAAGCCACGTTTGGTGGT  
GGCGACCATCCTCCAGGTTCTGCGGGTTTAGCAGAGCGGCAGCTAAAGAAGCTGCT  
GCCAAAGAAGCTGCCGCGAAAGAAGCGGCTGCCAAGGCTGCGGCATGTGTAATCATG  
TGA

### **RhoGDI**

Protein sequence

MSPILGYWKIKGLVQPTRLLEYLEEKYEEHLYERDEGDKWRNKKFELGLEFPNLPYYID  
GDVKLTQSMAIIRYIADKHNMLGGCPKERAEISMLEGAVLDIRYGVSRIAYS KDFETLKV  
DFLSKLP EMLKMFEDRLCHKTYLNGDHVTHPDFMLYDALDVVLYMDP MCLDAFPKLV  
FKKRIEAI PQIDKYLKSSKYIAWPLQGWQATFGGGDHPPKSDLEVLFQGPLGSPEFMAEQE  
PTAEQLAQIAENEDEHSVNYKPPAQKSIQEIQELDKDDESLRKYKEALLGRVAVSADP  
NVPNVVVTGLTLVCSSAPGPLELDLTGDLESFKKQSFVLKEGVEYRIKISFRVNREIVSGM  
KYIQHTYRKGVKIDKTDYMVGSYGPRAEYEFLTPVEEAPKGMLARGSYSIKSRFTDDD  
KTDHLSWEWNLTIKKDWKD\*

DNA sequence

ATGTCCCCTATACTAGGTTATTGGAAAATTAAGGGCCTTGTGCAACCCACTCGACTTC  
TTTTGGAATATCTTGAAGAAAAATATGAAGAGCATTTGTATGAGCGCGATGAAGGTG  
ATAAATGGCGAAACAAAAAGTTTGAATTGGGTTTGGAGTTTCCCAATCTTCCTTATTA  
TATTGATGGTGATGTTAAATTAACACAGTCTATGGCCATCATA CGTTATATAGCTGAC  
AAGCACAACATGTTGGGTGGTTGTCCAAAAGAGCGTGCAGAGATTTCAATGCTTGAA  
GGAGCGGTTTTGGATATTAGATACGGTGTTCGAGAATTGCATATAGTAAAGACTTTG  
AAACTCTCAAAGTTGATTTTCTTAGCAAGCTACCTGAAATGCTGAAAATGTTCGAAGA  
TCGTTTATGTCATAAAACATATTTAAATGGTGATCATGTAACCCATCCTGACTTCATG  
TTGTATGACGCTCTTGATGTTGTTTTATACATGGACCCAATGTGCCTGGATGCGTTCCC  
AAAATTAGTTTGTTTTAAAAAACGTATTGAAGCTATCCACAAATTGATAAGTACTTG  
AAATCCAGCAAGTATATAGCATGGCCTTTCAGGGCTGGCAAGCCACGTTTGGTGGT  
GGCGACCATCCTCCAAAATCGGATCTGGAAGTTCTGTTCCAGGGGGCCCCTGGGATCCC  
CGAATTCATGGCCGAGCAAGAACCGACTGCAGAACAACCTTGCGCAAATTGCAGCGG  
AAAACGAGGAAGATGAGCATAGCGTGAAC TACAAACCACCAGCCCAGAAAAGCATT  
CAGGAAATTCAGGAGCTGGATAAAGACGATGAATCGCTGCGGAAATACAAAGAAGC  
CCTCTTAGGTTCGTGTAGCGGTTTCAGCGGATCCGAATGTCCCGAATGTTGTGGTGACT  
GGCCTGACGTTGGTCTGCAGCAGTGCTCCTGGTCCGTTAGAGCTGGATCTGACGGGTG  
ATCTGGAATCGTTCAAGAAACAGAGCTTTGTCCTGAAAGAAGGGGTGGAATATCGCA  
TCAAAATCTCTTTTCGCGTAAATCGCGAAATTGTGTCTGGCATGAAATACATTCAGCA  
CACCTATCGCAAAGCGTGAAAATCGACAAAACGGACTATATGGTTGGATCGTATGG



TCCTCGTGC GGAAGAGTATGAGTTCCTCACACCGGTTGAAGAAGCACCCAAAGGCAT  
GCTTGCTCGTGGGTCCTACTCCATTAAGTCACGCTTACCGACGATGACAAGACCGAT  
CATCTGAGTTGGGAATGGAACCTGACCATCAAGAAAGACTGGAAAGATTGA

**mCherry-CAAX<sub>Cdc42</sub>**

Protein sequence

MKHHHHHHHHHSAGLEVL FQGPMVSKGEEDNMAIIEFMRFKVHMEGSVNGHEFEIE  
GEGEGRPYEGTQTAKLKVTKGGPLPFAWDILSPQFMYGSKAYVKHPADIPDYLKLSFPEG  
FKWERVMNFEDGGVVTVTQDSSLQDGEFIYKVKLRGTNFPDGPVMQKKTMGWEASSE  
RMYPEDGALKGEIKQRLKLDGGHYDAEVKTTYKAKKPVQLPGAYNVNIKLDITSHNED  
YTIVEQYERAEGRHSTGGMDELYKLAEEAAKEAAAKEAAAKEAAAKAAAGCVLL\*

DNA sequence

ATGAAACATCACCATCACCATCACCATCACCATTCCGCGGGTCTGGAAGTTCTGT  
TCCAGGGGCCCATGGTGAGCAAGGGCGAGGAGGATAACATGGCCATCATCAAGGAG  
TTCATGCGCTTCAAGGTGCACATGGAGGGCTCCGTGAACGGCCACGAGTTCGAGATC  
GAGGGCGAGGGCGAGGGCCGCCCTACGAGGGCACCCAGACCGCCAAGCTGAAGGT  
GACCAAGGGTGGCCCCCTGCCCTTCGCCTGGGACATCCTGTCCCCTCAGTTCATGTAC  
GGCTCCAAGGCCTACGTGAAGCACCCCGCGACATCCCCGACTACTTGAAGCTGTCCT  
TCCCCGAGGGCTTCAAGTGGGAGCGCGTGATGAACTTCGAGGACGGCGGCGTGGTGA  
CCGTGACCCAGGACTCCTCCCTGCAGGACGGCGAGTTCATCTACAAGGTGAAGCTGC  
GCGGCACCAACTTCCCCTCCGACGGCCCCGTAATGCAGAAGAAGACCATGGGCTGGG  
AGGCCTCCTCCGAGCGGATGTACCCCGAGGACGGCGCCCTGAAGGGCGAGATCAAGC  
AGAGGTGAAGCTGAAGGACGGCGGCCACTACGACGCTGAGGTCAAGACCACCTAC  
AAGGCCAAGAAGCCCGTGCAGCTGCCCGGCGCCTACAACGTCAACATCAAGTTGGAC  
ATCACCTCCCACAACGAGGACTACACCATCGTGGAACAGTACGAACGCGCCGAGGGC  
CGCCACTCCACCGGCGGCATGGACGAGCTGTACAAGTTAGCAGAGGGCGGCAGCTAAA  
GAAGCTGCTGCCAAGAAGCTGCCGCGAAAGAAGCGGCTGCCAAGGCTGCGGCAGG  
GTGCGTTCTGCTTTGA

**RhoA**

Protein sequence

MKHHHHHHHHHSAGLEVL FQGPMAAIRKKLVIVGDGACGKTCLLIVFSKDQFPEVYVP  
TVFENYVADIEVDGKQVELALWDTAGQEDYDRLRPLSYPD TDVILMCF SIDSPDSLENIPE  
KWTPEVKHFPCNPVPIILVGNKKDLRND EHTRRELAKMKQEPVKPEEGRDMANRIGAFGY  
MECSAKTKDGVREVFEMATRAALQARRGKKKSGCLVL\*

DNA sequence

ATGAAACATCACCATCACCATCACCATCACCATTCCGCGGGTCTGGAAGTTCTGT  
TCCAGGGGCCCATGGCGGCAATTTCGCAAGAACTGGTGATTGTAGGCGATGGTGCCT  
GTGGCAAACCTGTCTGCTGATCGTGTTCTCCAAAGACCAGTTTCTGAAGTGTATGT  
TCCCACCGTATTCGAAAAC TACGTAGCGGACATTGAGGTTGATGGCAAACAGGTGGA  
ATTAGCCCTGTGGGATACCGCAGGGCAAGAAGATTATGACCGGTTGCGCCCGTTAAG  
CTATCCG GATACGGACGTCATCCTGATGTGCTTCAGCATCGATTGCGCCAGATTCTCTC  
GAGAACATTCCGGAGAAATGGACACCAGAAGTCAAACACTTTTGCCCGAATGTTCCG  
ATTATCCTGGTGGGCAATAAGAAAGACCTTCGCAACGATGAGCATAACCCGTCGCGAA

CTGGCGAAAATGAAACAGGAACCTGTCAAACCGGAAGAGGGACGTGACATGGCCAA  
TCGCATTGGTGCCTTTGGGTACATGGAATGCAGTGCGAAAACGAAAGATGGTGTTCG  
CGAAGTGTGGAAATGGCCACTCGTGCTGCTCTCCAAGCACGTCTGGTAAGAAGAA  
ATCAGGCTGTTTGGTCCTGTGA

### **RhoC**

Protein sequence

MKHHHHHHHHHSAGLEVLFQGPMAAIRKKLVIVGDGACGKTCLLIVFSKDQFPEVYVP  
TVFENYIADIEVDGKQVELALWDTAGQEDYDRLRPLSYPD TDVILMCFSIDSPDSLENIPE  
KWTPEVKHFCPNVPIILVGNKKDLRQDEHTRRELAKMKQEPVRSEGRDMANRISAFGY  
LECSAKTKEGVREVFEMATRAGLQVRKNKRRRGCPIL\*

DNA sequence

ATGAAACATCACCATCACCATCACCATCATCACCATTCCGCGGGTCTGGAAGTTCTGT  
TCCAGGGGCCCATGGCAGCAATTGCAAGAACTGGTGATTGTCGGCGATGGTGCCT  
GTGGCAAACCTGTCTGCTGATTGTGTTCTCAAAGACCAGTTTCCTGAAGTGTATGT  
GCCGACAGTTTTCGAGAACTACATTGCGGATATCGAAGTAGACGGGAAACAGGTGGA  
ACTGGCGTTATGGGATACGGCTGGTCAGGAAGATTACGATCGCCTGCGTCCGTTGAG  
CTATCCGGATACCGATGTCATCCTCATGTGCTTCTCGATTGACAGCCCTGACAGTCTG  
GAAAATATCCCCGAGAAATGGACGCCAGAAGTCAAGCACTTTTGCCCGAATGTACCG  
ATCATCCTTGTAGGCAACAAGAAAGATCTGCGCCAAGACGAACATACCCGTCGCGAA  
TTGGCGAAAATGAAACAAGAGCCAGTTCGGTCAGAAGAAGGTCGCGATATGGCTAAT  
CGCATTTGCGCCTTTGGCTATCTGGAATGCTCTGCGAAAACCAAAGAAGGAGTTCGC  
GAGGTGTTTGAGATGGCCACTCGTGCAGGGTTACAGGTTTCGCAAGAACAACGTCGT  
CGGGGTTGTCCGATTCTCTAA

### **Rac1**

Protein sequence

MKHHHHHHHHHSAGLEVLFQGPMQAIKCVVVDGAVGKTCLLISYTTNAFPGEYIPTV  
FDNYSANVMVDGKPVNLGLWDTAGQEDYDRLRPLSYPQTDVFLICFSLVSPASFENVRA  
KWYPEVRHHCNPNTPIILVGTKLDRDDKDTIEKLKEKKTLPITYPQGLAMAKEIGAVKYL  
ECSALTQRGLKTVFDEAIRAVLCPVPVKKRKRKCLLL\*

DNA sequence

ATGAAACATCACCATCACCATCACCATCATCACCATTCCGCGGGTCTGGAAGTTCTGT  
TCCAGGGGCCCATGCAGGCGATCAAATGCGTAGTTGTCGGCGATGGTGCCGTCGGAA  
AGACCTGTCTGCTGATTAGCTACACCACAAACGCGTTTCCTGGCGAATACATCCCAAC  
CGTTTTCGACAATTCGCGCAATGTGATGGTTGATGGGAAACCCGTTGAATCTGGGC  
TTGTGGGATACTGCTGGTCAGGAGGATTACGATCGCTTACGCCACTTAGCTATCCAC  
AGACAGACGCTTTCTGATCTGCTTTTCACTGGTGTCTCCCGCTTCTTCGAAAACGTA  
CGCGCAAATGGTATCCGGAAGTTCGTCACCATTGCCCGAATACGCCGATTATCCTCG  
TAGGTACCAAACCTCGATTTGCGCGATGACAAAGACACGATTGAGAACTGAAGGAAA  
AGAAACTGACGCCGATTACCTATCCGCAAGGCTTAGCAATGGCAAAGAGATTGGTG  
CAGTCAAATATCTGGAATGCAGTGCAGTCAACGTGGGCTGAAAACCGTGTTCG  
ATGAAGCGATTCGTGCGGTGTTATGTCCGCCTCCGGTGAAGAAACGGAAACGCAAT  
GTTTGCTGCTTTGA

## **KrasB**

### Protein sequence

MKHHHHHHHHHSAGLEVLFQGPMTEYKLVVVGAGGVGKSALTIQLIQNHVDEYDPT  
IEDSYRKQVVIDGETCLLDILDITAGQEEYSAMRDQYMRTGEGFLCVFAINNTKSFEDIHH  
YREQIKRVKDSEDVPMVLVGNKCDLPSRTVDTKQAQDLARSYGIPFIETSAKTRQGVDD  
AFYTLVREIRKHKEKMSKDGK**KKKKKSKTKCVIM\***

### DNA sequence

ATGAAACATCACCATCACCATCACCATCACCATTCCGCGGGTCTGGAAGTTCTGT  
TCCAGGGGCCCATGACCGAATACAAACTGGTCGTAGTGGGTGCTGGTGGTGTGGCA  
AATCAGCGTTGACCATTGAGCTGATTCAGAATCACTTCGTGGATGAGTATGATCCGAC  
AATTGAGGATAGCTATCGCAAACAGGTAGTGATTGACGGCGAAACTTGCCTCTTAGA  
CATTCTGGATACCGCTGGGCAAGAAGAGTACTCTGCAATGCGCGATCAGTACATGCG  
TACTGGTGAAGGCTTTCTGTGTGCTTTGCGATCAACAATACCAAGAGCTTCGAAGAT  
ATCCATCATTATCGGGAACAGATCAAACGTGTGAAAGACTCGGAAGATGTGCCAATG  
GTCCTTGTGGCAACAAATGCGATCTGCCTAGTCGTACCGTTGACACGAAACAAGCCC  
AGGACTTAGCACGCAGTTATGGCATTCCGTTTATTGAAACATCCGCCAAAACCCGTCA  
AGGAGTTGATGATGCGTTTTATACGCTGGTACGCGAAATCCGCAAACACAAAGAGAA  
AATGTGCAAAGACGGGAAGAAGAAGAAAAGAAAAGCAAACGAAATGTGTGATCA  
TGTGA

## **HRas**

### Protein sequence

MKHHHHHHHHHSAGLEVLFQGPMTEYKLVVVGAGGVGKSALTIQLIQNHVDEYDPT  
IEDSYRKQVVIDGETCLLDILDITAGQEEYSAMRDQYMRTGEGFLCVFAINNTKSFEDIHQ  
YREQIKRVKDSDDVPMVLVGNKCDLAARTVESRQAQDLARSYGIPYIETSAKTRQVED  
AFYTLVREIRQHKLRLNPPDESGPGCMSCKCVLS\*

### DNA sequence

ATGAAACATCACCATCACCATCACCATCACCATTCCGCGGGTCTGGAAGTTCTGT  
TCCAGGGGCCCATGACCGAATACAAGCTGGTGGTCGTAGGGGCTGGAGGTGTTGGCA  
AAAGTGCCTGACCATCCAGCTGATTCAGAACCCTTCGTGGATGAGTACGACCCCA  
CCATTGAAGATAGCTATCGCAAACAGGTGCTGATTGACGGAGAGACTTGTGGTGG  
ACATTCTGGATACAGCTGGCCAAGAAGAGTATAGCGCAATGCGCGATCAGTACATGC  
GTACCGGTGAAGGCTTTCTGTGCGTGTGGCGATCAACAACACGAAATCCTTTGAGGA  
CATCCATCAGTATCGCGAACAGATCAAACGCGTCAAAGACAGCGATGATGTGCCGAT  
GGTTCTGGTTGGGAATAAGTGCATTTAGCCGCACGTACGGTTGAATCGCGTCAAGC  
GCAAGATCTTGCCCGTTCCTATGGCATTCCGTATATCGAAACCTCTGCCAAAACGCGT  
CAAGGTGTAGAAGATGCGTTCTACTCTGGTACGCGAAATTCGGCAGCATAAACTG  
CGAAACTCAATCCGCCAGACGAAAGTGGTCTGGCTGTATGTCGTGTAAGTGCCTG  
TTATCATGA

## **Cdc42**

### Protein sequence

MKHHHHHHHHHSAGLEVLFQGPMQTIKCVVVGDGAVGKTCLLISYTTNKFPSYVPTV  
FDNYAVTVMIGGEPYTLGLFDITAGQEDYDRLRPLSYPTDVFVLCFVSVSPSSFENVKEK

WVPEITHHCPKTPFLLVGTQIDLRDDPSTIEKLAKNKQKPITPETAEKLARDLKAVKYVEC  
SALTQKGLKNVFDEAILAALEPPEPKKSRRCVLL\*

DNA sequence

ATGAAACATCACCATCACCATCACCATCATCACCATTCCGCGGGTCTGGAAGTTCTGT  
TCCAGGGGCCCATGCAGACCATCAAATGCGTAGTCGTGGGTGATGGAGCAGTTGGCA  
AAACGTGTCTGCTCATCTCCTATAACCACCAACAAATTTCCAGCGAATACGTGCCTAC  
GGTATTCGACAATTACGCGGTTACCGTCATGATTGGTGGTGAACCCTATACCTGGGC  
CTGTTTCGATACTGCAGGCCAAGAGGACTATGATCGCTTACGCCCTCTGTCGTATCCGC  
AAACCGACGTCTTTCTTGTGTGCTTTAGCGTTGTGTCTCCGAGTTCGTTTCGAAAACGT  
GAAAGAGAAATGGGTACCGGAAATTACGCACCATTGTCCGAAAACCTCCGTTTCTGCT  
GGTTGGCACACAGATCGATCTGCGCGATGATCCAAGCACCATTGAGAAACTTGCCAA  
GAACAAACAGAAACCGATTACGCCAGAAACTGCGGAGAAATTAGCCCGTGATCTGA  
AAGCCGTCAAGTACGTGGAATGCTCAGCTTTGACACAGAAAGGGCTGAAGAATGTGT  
TTGACGAAGCGATTCTGGCTGCGTTAGAACCGCCAGAACCGAAGAAAAGTCGTCGGT  
GTGTTCTCCTGTGA

### **mCherry-Cdc42**

Protein sequence

MKHHHHHHHHHSAGLEVLVLFQGPVSKGEEDNMAIIEFMRFKVHMEGSVNGHEFEIE  
GEGEGRPYEGTQTAKLKVTKGGPLPFAWDILSPQFMYGSKAYVKHPADIPDYLKLSFPEG  
FKWERVMNFEDGGVVTVTQDSSLQDGEFIYKVKLRGTFNPSDGPVMQKKTMGWEASSE  
RMYPEDGALKGEIKQRLKLDGGHYDAEVKTTYKAKKPVQLPGAYNVNIKLDITSHNED  
YTIVEQYERAEGRHSTGGMDELYKEFMQTIKVVVVDGAVGKTCLLISYTTNKFSEYVP  
TVFDNYAVTVMIGGEPYTLGLFDTAGQEDYDRLRPLSYPQTDVFLVCFVSVSPSSFENVK  
EKWVPEITHHCPKTPFLLVGTQIDLRDDPSTIEKLAKNKQKPITPETAEKLARDLKAVKYV  
ECSALTQKGLKNVFDEAILAALEPPEPKKSRRCVLL\*

DNA sequence

ATGAAACATCACCATCACCATCACCATCATCACCATTCCGCGGGTCTGGAAGTTCTGT  
TCCAGGGGCCCATGGTGAGCAAGGGCGAGGAGGATAACATGGCCATCATCAAGGAG  
TTCATGCGCTTCAAGGTGCACATGGAGGGCTCCGTGAACGGCCACGAGTTCGAGATC  
GAGGGCGAGGGCGAGGGCCGCCCTACGAGGGCACCCAGACCGCCAAGCTGAAGGT  
GACCAAGGGTGGCCCCCTGCCCTTCGCCTGGGACATCCTGTCCCCTCAGTTCATGTAC  
GGCTCCAAGGCCTACGTGAAGCACCCCGCCGACATCCCCGACTACTTGAAGCTGTCCT  
TCCCCGAGGGCTTCAAGTGGGAGCGCGTGATGAACTTCGAGGACGGCGGCGTGGTGA  
CCGTGACCCAGGACTCCTCCCTGCAGGACGGCGAGTTCATCTACAAGGTGAAGCTGC  
GCGGCACCAACTTCCCCTCCGACGGCCCCGTAATGCAGAAGAAGACCATGGGCTGGG  
AGGCCTCCTCCGAGCGGATGTACCCCGAGGACGGCGCCCTGAAGGGCGAGATCAAGC  
AGAGGCTGAAGCTGAAGGACGGCGGCCACTACGACGCTGAGGTCAAGACCACCTAC  
AAGGCCAAGAAGCCCGTGCAGCTGCCCGGCGCCTACAACGTCAACATCAAGTTGGAC  
ATCACCTCCCACAACGAGGACTACACCATCGTGGAACAGTACGAACCGCGCCGAGGGC  
CGCCACTCCACCGCGGCATGGACGAGCTGTACAAGGAATTTATGCAGACCATCAAA  
TGCGTAGTCGTGGGTGATGGAGCAGTTGGCAAACGTGTCTGCTCATCTCCTATACCA  
CCAACAAATTTCCAGCGAATACGTGCCTACGGTATTCGACAATTACGCGGTTACCGT  
CATGATTGGTGGTGAACCCTATACCTGGGCCTGTTTCGATACTGCAGGCCAAGAGGA

CTATGATCGCTTACGCCCTCTGTCGTATCCGCAAACCGACGTCTTTCTTGTGTGCTTTA  
GCGTTGTGTCTCCGAGTTCGTTTCGAAAACGTGAAAGAGAAATGGGTACCGGAAATTA  
CGCACCATTGTCCGAAAACCTCCGTTTCTGCTGGTTGGCACACAGATCGATCTGCGCGA  
TGATCCAAGCACCATTGAGAAACTTGCCAAGAACAACAGAAACCGATTACGCCAGA  
AACTGCGGAGAAATTAGCCCGTGATCTGAAAGCCGTCAAGTACGTGGAATGCTCAGC  
TTTGACACAGAAAGGGCTGAAGAATGTGTTTGACGAAGCGATTCTGGCTGCGTTAGA  
ACCGCCAGAACCGAAGAAAAGTCGTCGGTGTGTTCTCCTGTAA

### **MSP1E3D1**

Protein sequence

MGSSHHHHHHENLYFQGSTFSKLREQLGPVTQEFWDNLEKETEGLRQEMSKDLEEVKA  
KVQPYLDDFQKKWQEEMELYRQKVEPLRAELQEGARQKLHELQEKLSPLGEEMRDRAR  
AHVDALRTHLAPYLDDFQKKWQEEMELYRQKVEPLRAELQEGARQKLHELQEKLSPLG  
EEMRDRARAHVDALRTHLAPYSDELRQRLAARLEALKENGGARLAEYHAKATEHLSTL  
SEKAKPALEDLRQGLLPVLESFKVSFLSALEEYTKKLNTQ\*

DNA sequence

ATGGGCAGCAGCCATCATCATCATCATGAAAACCTGTATTTTCAGGGCAGCACCT  
TTAGCAAACCTGCGTGAACAGCTGGGCCCGGTGACCCAGGAATTTTGGGATAACCTGG  
AAAAGAAACCGAAGGCCTGCGTCAGGAAATGAGCAAAGATCTGGAAGAGGTGAAA  
GCGAAAGTGCAGCCGTATCTGGATGACTTTCAGAAAAAATGGCAGGAAGAGATGGA  
ACTGTATCGTCAGAAAGTGAACCGCTGCGTGCGGAACTGCAGGAAGGCGCGCGTCA  
GAAACTGCATGAACTGCAGGAAAAACTGAGCCCGCTGGGCGAAGAGATGCGTGATC  
GTGCGCGTGCGCATGTGGATGCGCTGCGTACCCATCTGGCGCCGTATCTGGATGACTT  
TCAGAAAAAATGGCAGGAAGAGATGGAAGTGTATCGTCAGAAAGTGAACCGCTGC  
GTGCGGAACTGCAGGAAGGCGCGCGTCAGAACTGCATGAACTGCAGGAAAAACTG  
AGCCCGCTGGGCGAAGAGATGCGTGATCGTGCGCGTGCGCATGTGGATGCGCTGCGT  
ACCCATCTGGCGCCGTATAGCGATGAACTGCGTCAGCGTCTGGCGGCCCGTCTGGAA  
GCGCTGAAAGAAAACGGCGGTGCGCGTCTGGCGGAATATCATGCGAAAGCGACCGA  
ACATCTGAGCACCCCTGAGCGAAAAAGCGAAACCGGCGCTGGAAGATCTGCGTCAGG  
GCCTGCTGCCGGTGCTGGAAAGCTTTAAAGTGAGCTTCTGAGCGCGCTGGAAGAGT  
ATACCAAAAAACTGAACACCCAGTAA

### **Z-stack analysis macro code:**

```
setPasteMode("Copy");
originalImage = getTitle();

getDimensions(width, height, channels, slices, frames);
newImage(originalImage + "_membraneSliceTimeSeries", bitDepth+"-bit", width, height, channels,
1, frames);
membraneSliceTimeSeries = getTitle();

for(t=1; t<=frames; t++) {
    selectWindow(originalImage);
    //Select the first channel, slice and frame t.
    Stack.setPosition(1,1,t);
    brightestMean = 0;
    brightestSlice = 1;
    for(i=1; i<slices; i++) {
        Stack.setPosition(1,i,t);
        getStatistics(area, mean);
        if(brightestMean<mean) {
            brightestMean = mean;
            brightestSlice = i;
        }
    }
    //print(brightestSlice); //test
    Stack.setPosition(1,brightestSlice,t);
    run("Select All");
    run("Copy");
    selectWindow(membraneSliceTimeSeries);
    Stack.setPosition(1,1,t);
    run("Paste");
    //print the second channel
    selectWindow(originalImage);
    Stack.setPosition(2,brightestSlice,t);
    run("Select All");
    run("Copy");
    selectWindow(membraneSliceTimeSeries);
    Stack.setPosition(2,1,t);
    run("Paste");
}
```

### **Supplementary References**

(1) Dursina, B.; Reents, R.; Delon, C.; Wu, Y. W.; Kulharia, M.; Thutewohl, M.; Veligodsky, A.; Kalinin, A.; Evstifeev, V.; Ciobanu, D.; et al. Identification and specificity profiling of protein prenyltransferase inhibitors using new fluorescent phosphoisoprenoids. *J. Am. Chem. Soc.* 2006, 128 (9), 2822-2835. DOI: 10.1021/ja052196e.

(2) Li, Y.; Wang, E. D.; Wang, Y. L. A modified procedure for fast purification of T7 RNA polymerase. *Protein Expres. Purif.* 1999, 16 (2), 355-358. DOI: 10.1006/prev.1999.1083.
